# Supplementary material for: Evaluation of four interventions using behavioural economics insights to increase demand for voluntary medical male circumcision in South Africa through the MoyaApp: A quasi-experimental study
Source: bioRxiv or medRxiv preprint supplement (doi:10.1101/2024.01.18.24301032), 2024-01-19
Supplement: Supplementary file [file media-1.pdf]

**Article: A quasi-experimental study in South Africa of four interventions using behavioural economics insights to increase demand for medical male circumcision using the MoyaApp**

**Supplementary Materials**

**Table S1. Sequencing of VMMC study forms on the MoyaApp**

|            | <b>Monday</b>           | <b>Wednesday</b>        | <b>Friday</b>                  |
|------------|-------------------------|-------------------------|--------------------------------|
| <b>W1</b>  | Stand Proud (SP)        | Active Choice (AC)      | Reserved for You (RFY)         |
| <b>W2</b>  | Foot in the Door (FITD) | Standard of Care (SOC)  | Stand Proud (SP)               |
| <b>W3</b>  | Active Choice (AC)      | Reserved for You (RFY)  | Foot in the Door (FITD)        |
| <b>W4</b>  | Standard of Care (SOC)  | Stand Proud (SP)        | Active Choice (AC)             |
| <b>W5</b>  | Reserved for You (RFY)  | Foot in the Door (FITD) | Standard of Care (SOC)         |
| <b>W6</b>  | Stand Proud (SP)        | Active Choice (AC)      | Reserved for You (RFY)         |
| <b>W7</b>  | Foot in the Door (FITD) | Standard of Care (SOC)  | <b>Reserved for You (RFY)*</b> |
| <b>W8</b>  | Active Choice (AC)      | Reserved for You (RFY)  | Foot in the Door (FITD)        |
| <b>W9</b>  | Standard of Care (SOC)  | Stand Proud (SP)        | Active Choice (AC)             |
| <b>W10</b> | Reserved for You (RFY)  | Foot in the Door (FITD) | Standard of Care (SOC)         |
| <b>W11</b> | Stand Proud (SP)        | Active Choice (AC)      | <b>Stand Proud (SP)*</b>       |
| <b>W12</b> | Foot in the Door (FITD) | Standard of Care (SOC)  | Stand Proud (SP)               |
| <b>W13</b> | Active Choice (AC)      | Reserved for You (RFY)  | Foot in the Door (FITD)        |
| <b>W14</b> | Standard of Care (SOC)  | Stand Proud (SP)        | Active Choice (AC)             |
| <b>W15</b> | Reserved for You (RFY)  | Foot in the Door (FITD) | Standard of Care (SOC)         |

\*Deviation in form rotation in W7 compensated for in W11

**Table S2 Ordinary least squares regression models assessing the association between VMMC forms submitted across five study groups by adults who viewed the forms during August and November 2022 in South Africa (N=118,337)**

|                                              | N      | % Submissions | Submitted Forms                             |                                           |
|----------------------------------------------|--------|---------------|---------------------------------------------|-------------------------------------------|
|                                              |        |               | Unadjusted<br>(Model 1)<br>$\beta$ [95% CI] | Adjusted<br>(Model 2)<br>$\beta$ [95% CI] |
| Study groups (ref:<br>Standard of Care, SOC) | 24,459 | 6.3           |                                             |                                           |
| Foot-in-the-Door                             | 22,351 | 7.4           | 0.012***<br>[0.004 - 0.019]                 | 0.013***<br>[0.009 - 0.017]               |
| Stand Proud                                  | 23,195 | 5.8           | -0.005<br>[-0.012 - 0.002]                  | -0.002<br>[-0.008 - 0.003]                |
| Reserved for You                             | 24,178 | 5.6           | -0.007*<br>[-0.014 - 0.000]                 | -0.005**<br>[-0.009 - -0.001]             |
| Active Choice                                | 24,154 | 5.0           | -0.013***<br>[-0.019 - -0.006]              | -0.011***<br>[-0.017 - -0.006]            |
| Day of the week<br>controls (ref Monday)     |        |               |                                             |                                           |
| Wednesday                                    |        |               | 0.004***                                    | [0.001 - 0.007]                           |
| Friday                                       |        |               | 0.002                                       | [-0.001 - 0.005]                          |
| Study week controls<br>(ref week 1)          |        |               |                                             |                                           |
| Week 2                                       |        |               |                                             | 0.001<br>[-0.007 - 0.009]                 |
| Week 3                                       |        |               |                                             | 0.013***<br>[0.006 - 0.019]               |
| Week 4                                       |        |               |                                             | 0.012***<br>[0.006 - 0.019]               |
| Week 5                                       |        |               |                                             | 0.012***<br>[0.007 - 0.018]               |
| Week 6                                       |        |               |                                             | 0.015***<br>[0.011 - 0.018]               |
| Week 7                                       |        |               |                                             | 0.011***<br>[0.007 - 0.015]               |
| Week 8                                       |        |               |                                             | 0.012***<br>[0.009 - 0.015]               |
| Week 9                                       |        |               |                                             | 0.016***<br>[0.010 - 0.023]               |
| Week 10                                      |        |               |                                             | 0.021***<br>[0.017 - 0.024]               |
| Week 11                                      |        |               |                                             | 0.013***<br>[0.009 - 0.017]               |
| Week 12                                      |        |               |                                             | 0.019***<br>[0.014 - 0.024]               |
| Week 13                                      |        |               |                                             | 0.016***<br>[0.009 - 0.023]               |
| Week 14                                      |        |               |                                             | 0.016***<br>[0.006 - 0.025]               |

|              |         |                 |
|--------------|---------|-----------------|
| Week 15      |         | 0.016***        |
|              |         | [0.008 - 0.024] |
| Observations | 118,337 | 118,337         |
| R-squared    | 0.001   | 0.002           |

\* p<0.1, \*\* p<0.05, \*\*\* p<0.01

**Table S3 Logistic regression models assessing the association between VMMC forms submitted across five study groups by adults who viewed the forms during August and November 2022 in South Africa (N=118,337)**

|                                           | N      | % Submissions | Submitted Forms                                |                                              |
|-------------------------------------------|--------|---------------|------------------------------------------------|----------------------------------------------|
|                                           |        |               | Unadjusted (Model 1)<br>Odds ratio<br>[95% CI] | Adjusted (Model 2)<br>Odds ratio<br>[95% CI] |
| Study groups (ref: Standard of Care, SOC) | 24,459 | 6.3           |                                                |                                              |
| Foot-in-the-Door                          | 22,351 | 7.4           | 1.204***<br>[1.071 - 1.353]                    | 1.220***<br>[1.145 - 1.300]                  |
| Stand Proud                               | 23,195 | 5.8           | 0.915<br>[0.810 - 1.033]                       | 0.956<br>[0.871 - 1.049]                     |
| Reserved for You                          | 24,178 | 5.6           | 0.884*<br>[0.781 - 1.000]                      | 0.913**<br>[0.852 - 0.980]                   |
| Active Choice                             | 24,154 | 5.0           | 0.789***<br>[0.701 - 0.887]                    | 0.806***<br>[0.729 - 0.892]                  |
| Day of the week controls (ref Monday)     |        |               |                                                |                                              |
| Wednesday                                 |        |               |                                                | 1.070**<br>[1.016 - 1.128]                   |
| Friday                                    |        |               |                                                | 1.031<br>[0.979 - 1.086]                     |
| Study week controls (ref week 1)          |        |               |                                                |                                              |
| Week 2                                    |        |               |                                                | 1.057<br>[0.911 - 1.226]                     |
| Week 3                                    |        |               |                                                | 1.317***<br>[1.176 - 1.475]                  |
| Week 4                                    |        |               |                                                | 1.312***<br>[1.161 - 1.482]                  |
| Week 5                                    |        |               |                                                | 1.302***<br>[1.179 - 1.439]                  |
| Week 6                                    |        |               |                                                | 1.369***<br>[1.265 - 1.482]                  |
| Week 7                                    |        |               |                                                | 1.278***<br>[1.189 - 1.375]                  |
| Week 8                                    |        |               |                                                | 1.306***<br>[1.226 - 1.392]                  |
| Week 9                                    |        |               |                                                | 1.410***<br>[1.250 - 1.589]                  |
| Week 10                                   |        |               |                                                | 1.491***<br>[1.384 - 1.606]                  |
| Week 11                                   |        |               |                                                | 1.330***<br>[1.221 - 1.450]                  |
| Week 12                                   |        |               |                                                | 1.460***<br>[1.338 - 1.594]                  |
| Week 13                                   |        |               |                                                | 1.399***                                     |

|              |         |                             |
|--------------|---------|-----------------------------|
| Week 14      |         | [1.237 - 1.581]<br>1.390*** |
| Week 15      |         | [1.166 - 1.657]<br>1.391*** |
| Observations | 118,337 | [1.221 - 1.585]<br>118,337  |

\* p<0.1, \*\* p<0.05, \*\*\* p<0.01

**Table S4 Ordinary least squares regression on factors associated with not being included on the contact list**

|                                           | N     | Contacts Attempted   |                                        |
|-------------------------------------------|-------|----------------------|----------------------------------------|
|                                           |       | % Contacts Attempted | Adjusted (Model 2)<br>$\beta$ [95% CI] |
| Study groups (ref: Standard of Care, SOC) | 1,433 | 51.8                 |                                        |
| Foot-in-the-Door                          | 1,576 | 62.1                 | 0.129***<br>[0.093 - 0.166]            |
| Stand Proud                               | 1,262 | 70.9                 | 0.181***<br>[0.140 - 0.223]            |
| Reserved for You                          | 1,261 | 64.4                 | 0.109***<br>[0.069 - 0.148]            |
| Active Choice                             | 1,120 | 64.8                 | 0.117***<br>[0.075 - 0.159]            |
| Day of the week controls (ref: Monday)    |       |                      |                                        |
| Wednesday                                 |       |                      | -0.029**<br>[-0.058 - -0.000]          |
| Friday                                    |       |                      | -0.039***<br>[-0.066 - -0.011]         |
| Study week controls (ref 1)               |       |                      |                                        |
| Week 2                                    |       |                      | -0.113***<br>[-0.187 - -0.039]         |
| Week 3                                    |       |                      | 0.052<br>[-0.019 - 0.123]              |
| Week 4                                    |       |                      | -0.072**<br>[-0.142 - -0.002]          |
| Week 5                                    |       |                      | 0.013<br>[-0.058 - 0.085]              |
| Week 6                                    |       |                      | 0.076**<br>[0.007 - 0.145]             |
| Week 7                                    |       |                      | 0.009<br>[-0.060 - 0.078]              |
| Week 8                                    |       |                      | -0.244***<br>[-0.314 - -0.174]         |
| Week 9                                    |       |                      | 0.111***<br>[0.037 - 0.186]            |
| Week 10                                   |       |                      | -0.066*<br>[-0.135 - 0.004]            |
| Week 11                                   |       |                      | 0.050<br>[-0.021 - 0.121]              |
| Week 12                                   |       |                      | -0.195***<br>[-0.266 - -0.124]         |
| Week 13                                   |       |                      | -0.103***<br>[-0.177 - -0.029]         |
| Week 14                                   |       |                      | -0.045<br>[-0.119 - 0.030]             |
| Week 15                                   |       |                      | 0.091**<br>[0.018 - 0.165]             |
| Observations                              |       |                      | 6,652                                  |
| R-squared                                 |       |                      | 0.060                                  |

\*  $p < 0.1$ , \*\*  $p < 0.05$ , \*\*\*  $p < 0.01$

A total of 2,498 out of 6652 submitted forms were not included in the contact list due to an administrative error (i.e., no contact attempts were made based on these form)

**Table S5 Ordinary least squares regression models of the impact of the study forms on secondary study outcomes: successful contact by the call centre, booking/referral complete, circumcision complete**

|                                           | N   | % Contacted | Contacted                                |                                        | % Booked/Referred | Booked/Referred                          |                                        | % Circumcised | Circumcised                              |                                        |
|-------------------------------------------|-----|-------------|------------------------------------------|----------------------------------------|-------------------|------------------------------------------|----------------------------------------|---------------|------------------------------------------|----------------------------------------|
|                                           |     |             | Unadjusted (Model 1)<br>$\beta$ [95% CI] | Adjusted (Model 2)<br>$\beta$ [95% CI] |                   | Unadjusted (Model 3)<br>$\beta$ [95% CI] | Adjusted (Model 4)<br>$\beta$ [95% CI] |               | Unadjusted (Model 5)<br>$\beta$ [95% CI] | Adjusted (Model 6)<br>$\beta$ [95% CI] |
| Study groups (ref: Standard of Care, SOC) | 743 | 54.9%       |                                          |                                        | 14.4%             |                                          |                                        | 0.7%          |                                          |                                        |
| Foot-in-the-Door                          | 978 | 56.3%       | 0.014<br>[-0.053 - 0.081]                | -0.016<br>[-0.068 - 0.037]             | 11.3%             | -0.031<br>[-0.073 - 0.012]               | -0.050**<br>[-0.092 - -0.009]          | 1.1%          | 0.005<br>[-0.004 - 0.013]                | 0.002<br>[-0.007 - 0.011]              |
| Stand Proud                               | 895 | 47.3%       | -0.076**<br>[-0.145 - -0.008]            | -0.038<br>[-0.091 - 0.016]             | 14.5%             | 0.001<br>[-0.041 - 0.043]                | -0.031<br>[-0.081 - 0.018]             | 1.1%          | 0.004<br>[-0.005 - 0.014]                | 0<br>[-0.012 - 0.011]                  |
| Reserved for You                          | 812 | 58.1%       | 0.032<br>[-0.048 - 0.112]                | 0.040*<br>[-0.007 - 0.087]             | 16.6%             | 0.022<br>[-0.029 - 0.073]                | 0.01<br>[-0.032 - 0.053]               | 0.9%          | 0.002<br>[-0.007 - 0.011]                | 0.001<br>[-0.008 - 0.011]              |
| Active Choice                             | 726 | 55.0%       | 0<br>[-0.066 - 0.067]                    | 0.036<br>[-0.021 - 0.093]              | 17.2%             | 0.028<br>[-0.016 - 0.073]                | 0.011<br>[-0.038 - 0.059]              | 2.1%          | 0.014**<br>[0.000 - 0.027]               | 0.012*<br>[-0.000 - 0.025]             |
| Day of the week controls (ref: Monday)    |     |             |                                          |                                        |                   |                                          |                                        |               |                                          |                                        |
| Wednesday                                 |     |             |                                          | 0.021<br>[-0.011 - 0.053]              |                   |                                          | 0.000<br>[-0.032 - 0.033]              |               |                                          | -0.005<br>[-0.012 - 0.003]             |
| Friday                                    |     |             |                                          | -0.037**<br>[-0.073 - -0.000]          |                   |                                          | -0.019<br>[-0.051 - 0.013]             |               |                                          | -0.003<br>[-0.011 - 0.006]             |



| Study week<br>controls (ref<br>1) |                                |                               |                               |
|-----------------------------------|--------------------------------|-------------------------------|-------------------------------|
| Week 2                            | 0.045<br>[-0.095 -<br>0.185]   | 0.002<br>[-0.135 -<br>0.138]  | 0.001<br>[-0.030 -<br>0.032]  |
| Week 3                            | 0.107***<br>[0.045 -<br>0.168] | -0.026<br>[-0.120 -<br>0.068] | -0.004<br>[-0.028 -<br>0.020] |
| Week 4                            | 0.053<br>[-0.025 -<br>0.130]   | -0.002<br>[-0.103 -<br>0.098] | -0.004<br>[-0.029 -<br>0.021] |
| Week 5                            | 0.124***<br>[0.057 -<br>0.192] | -0.046<br>[-0.157 -<br>0.066] | -0.002<br>[-0.028 -<br>0.024] |
| Week 6                            | 0.077***<br>[0.021 -<br>0.134] | -0.023<br>[-0.113 -<br>0.066] | -0.013<br>[-0.037 -<br>0.011] |
| Week 7                            | 0.140***<br>[0.048 -<br>0.231] | -0.041<br>[-0.142 -<br>0.060] | -0.005<br>[-0.030 -<br>0.020] |
| Week 8                            | -0.072<br>[-0.161 -<br>0.017]  | -0.057<br>[-0.155 -<br>0.042] | -0.003<br>[-0.029 -<br>0.023] |
| Week 9                            | 0.052<br>[-0.013 -<br>0.117]   | -0.062<br>[-0.164 -<br>0.039] | -0.005<br>[-0.030 -<br>0.020] |
| Week 10                           | 0.143***<br>[0.069 -<br>0.218] | -0.030<br>[-0.130 -<br>0.070] | -0.003<br>[-0.028 -<br>0.021] |
| Week 11                           | 0.051*<br>[-0.010 -<br>0.113]  | -0.010<br>[-0.111 -<br>0.091] | 0.010<br>[-0.014 -<br>0.033]  |
| Week 12                           | 0.109***                       | 0.009                         | -0.005                        |

|              |       |                     |       |                     |       |                     |
|--------------|-------|---------------------|-------|---------------------|-------|---------------------|
|              |       | [0.043 -<br>0.175]  |       | [-0.080 -<br>0.097] |       | [-0.031 -<br>0.021] |
| Week 13      |       | 0.252***            |       | 0.018               |       | 0.009               |
|              |       | [0.187 -<br>0.316]  |       | [-0.100 -<br>0.136] |       | [-0.025 -<br>0.043] |
| Week 14      |       | 0.112*              |       | -0.045              |       | -0.008              |
|              |       | [-0.001 -<br>0.225] |       | [-0.142 -<br>0.052] |       | [-0.036 -<br>0.020] |
| Week 15      |       | 0.090**             |       | -0.091*             |       | -0.009              |
|              |       | [0.004 -<br>0.176]  |       | [-0.183 -<br>0.002] |       | [-0.033 -<br>0.015] |
| Observations | 4,154 | 4,154               | 4,154 | 4,154               | 4,154 | 4,154               |
| R-squared    | 0.006 | 0.021               | 0.004 | 0.009               | 0.002 | 0.005               |

\* p<0.1, \*\* p<0.05, \*\*\* p<0.01

**Table S6 Logistic regression models of VMMC engagement in the MoyaApp (dependent variables: successful contact, booking/referral, circumcision) (N=4,154)**

|                                                 |     | Contacted      |                                                 | Booked/Referred      |                                                 | Circumcised      |                                                 |
|-------------------------------------------------|-----|----------------|-------------------------------------------------|----------------------|-------------------------------------------------|------------------|-------------------------------------------------|
|                                                 | N   | %<br>Contacted | Adjusted<br>(Model 1)<br>Odds ratio<br>[95% CI] | %<br>Booked/Referred | Adjusted<br>(Model 2)<br>Odds ratio<br>[95% CI] | %<br>Circumcised | Adjusted<br>(Model 3)<br>Odds ratio<br>[95% CI] |
| Study groups<br>(ref: Standard<br>of Care, SOC) | 743 | 54.9%          |                                                 | 14.4%                |                                                 | 0.7%             |                                                 |
| Foot-in-the-<br>Door                            | 978 | 56.3%          | 0.924<br>[0.750 - 1.139]                        | 11.3%                | 0.642***<br>[0.462 - 0.892]                     | 1.1%             | 1.333<br>[0.473 - 3.755]                        |
| Stand Proud                                     | 895 | 47.3%          | 0.825*<br>[0.669 - 1.018]                       | 14.5%                | 0.737*<br>[0.520 - 1.044]                       | 1.1%             | 0.910<br>[0.253 - 3.267]                        |
| Reserved for<br>You                             | 812 | 58.1%          | 1.169*<br>[0.971 - 1.407]                       | 16.6%                | 1.062<br>[0.769 - 1.467]                        | 0.9%             | 1.145<br>[0.361 - 3.637]                        |
| Active Choice                                   | 726 | 55.0%          | 1.100<br>[0.883 - 1.370]                        | 17.2%                | 0.994<br>[0.699 - 1.414]                        | 2.1%             | 2.263<br>[0.815 - 6.284]                        |
| Day of the week controls (ref: Monday)          |     |                |                                                 |                      |                                                 |                  |                                                 |
| Wednesday                                       |     |                | 1.096<br>[0.960 - 1.251]                        |                      | 0.979<br>[0.776 - 1.237]                        |                  | 0.638<br>[0.326 - 1.248]                        |
| Friday                                          |     |                | 0.861**                                         |                      | 0.866                                           |                  | 0.847                                           |

|                                  | [0.747 - 0.993]             | [0.675 - 1.112]          | [0.456 - 1.575]          |
|----------------------------------|-----------------------------|--------------------------|--------------------------|
| Study week controls (ref Week 1) |                             |                          |                          |
| Week 2                           | 1.209<br>[0.695 - 2.105]    | 1.031<br>[0.386 - 2.754] | 1.059<br>[0.136 - 8.226] |
| Week 3                           | 1.573***<br>[1.209 - 2.046] | 0.823<br>[0.425 - 1.595] | 0.664<br>[0.133 - 3.303] |
| Week 4                           | 1.266<br>[0.919 - 1.746]    | 1.025<br>[0.512 - 2.049] | 0.754<br>[0.119 - 4.788] |
| Week 5                           | 1.651***<br>[1.240 - 2.199] | 0.687<br>[0.296 - 1.596] | 0.791<br>[0.117 - 5.337] |
| Week 6                           | 1.394***<br>[1.098 - 1.769] | 0.868<br>[0.468 - 1.611] | 0.183<br>[0.019 - 1.800] |
| Week 7                           | 1.803***<br>[1.238 - 2.626] | 0.756<br>[0.369 - 1.547] | 0.627<br>[0.095 - 4.149] |
| Week 8                           | 0.761<br>[0.526 - 1.101]    | 0.672<br>[0.334 - 1.350] | 0.758<br>[0.141 - 4.085] |
| Week 9                           | 1.233<br>[0.951 - 1.597]    | 0.605<br>[0.297 - 1.234] | 0.624<br>[0.105 - 3.713] |
| Week 10                          | 1.813***                    | 0.807                    | 0.750                    |

|                                                 |                             |                             |                             |
|-------------------------------------------------|-----------------------------|-----------------------------|-----------------------------|
|                                                 | [1.328 - 2.475]             | [0.413 - 1.580]             | [0.129 - 4.358]             |
| Week 11                                         | 1.310**<br>[1.009 - 1.701]  | 1.028<br>[0.509 - 2.075]    | 2.052<br>[0.470 - 8.948]    |
| Week 12                                         | 1.645***<br>[1.247 - 2.168] | 1.190<br>[0.645 - 2.193]    | 0.721<br>[0.086 - 6.013]    |
| Week 13                                         | 3.097***<br>[2.295 - 4.179] | 1.235<br>[0.570 - 2.678]    | 1.778<br>[0.288 - 10.957]   |
| Week 14                                         | 1.672**<br>[1.084 - 2.578]  | 0.787<br>[0.406 - 1.525]    | 0.618<br>[0.073 - 5.218]    |
| Week 15                                         | 1.520**<br>[1.072 - 2.155]  | 0.474**<br>[0.254 - 0.886]  | 0.326<br>[0.030 - 3.537]    |
| Multiple submissions<br>(ref single submission) | 2.610***<br>[1.968 - 3.462] | 3.206***<br>[2.402 - 4.279] | 4.798***<br>[2.619 - 8.789] |
| Observations                                    | 4,154                       | 4,154                       | 4,154                       |

\* p<0.1, \*\* p<0.05, \*\*\* p<0.01

**Table S7 Ordinary least squares regression models of VMMC engagement in the MoyaApp (dependent variables: successful contact, booking/referral, circumcision) (N=4,154) with controls for multiple submitters**

|                                                 | N   | %<br>Contacted | <b>Contacted</b><br>Adjusted (Model 1)<br>$\beta$ [95% CI] | %<br>Booked/Referred | <b>Booked/Referred</b><br>Adjusted (Model 2)<br>$\beta$ [95% CI] | % Circumcised | <b>Circumcised</b><br>Adjusted (Model 3)<br>$\beta$ [95% CI] |
|-------------------------------------------------|-----|----------------|------------------------------------------------------------|----------------------|------------------------------------------------------------------|---------------|--------------------------------------------------------------|
| Study groups<br>(ref: Standard<br>of Care, SOC) | 743 | 54.9%          |                                                            | 14.4%                |                                                                  | 0.7%          |                                                              |
| Foot-in-the-<br>Door                            | 978 | 56.3%          | -0.017                                                     | 11.3%                | -0.052***                                                        | 1.1%          | 0.002                                                        |
|                                                 |     |                | [-0.069 - 0.035]                                           |                      | [-0.090 - -0.014]                                                |               | [-0.007 - 0.011]                                             |
| Stand Proud                                     | 895 | 47.3%          | -0.047*                                                    | 14.5%                | -0.040*                                                          | 1.1%          | -0.002                                                       |
|                                                 |     |                | [-0.100 - 0.006]                                           |                      | [-0.086 - 0.007]                                                 |               | [-0.013 - 0.010]                                             |
| Reserved for<br>You                             | 812 | 58.1%          | 0.036                                                      | 16.6%                | 0.007                                                            | 0.9%          | 0.001                                                        |
|                                                 |     |                | [-0.010 - 0.081]                                           |                      | [-0.035 - 0.049]                                                 |               | [-0.009 - 0.011]                                             |
| Active Choice                                   | 726 | 55.0%          | 0.023                                                      | 17.2%                | -0.001                                                           | 2.1%          | 0.011*                                                       |
|                                                 |     |                | [-0.032 - 0.078]                                           |                      | [-0.048 - 0.046]                                                 |               | [-0.002 - 0.023]                                             |
| Day of the<br>week controls<br>(ref: Monday)    |     |                |                                                            |                      |                                                                  |               |                                                              |
| Wednesday                                       |     |                | 0.022                                                      |                      | 0.001                                                            |               | -0.005                                                       |
|                                                 |     |                | [-0.011 - 0.054]                                           |                      | [-0.030 - 0.032]                                                 |               | [-0.012 - 0.003]                                             |
| Friday                                          |     |                | -0.035*                                                    |                      | -0.018                                                           |               | -0.002                                                       |
|                                                 |     |                | [-0.071 - 0.000]                                           |                      | [-0.049 - 0.014]                                                 |               | [-0.011 - 0.006]                                             |
| Study week<br>controls (ref<br>1)               |     |                |                                                            |                      |                                                                  |               |                                                              |
| Week 2                                          |     |                | 0.044                                                      |                      | 0.001                                                            |               | 0.001                                                        |
|                                                 |     |                | [-0.093 - 0.182]                                           |                      | [-0.132 - 0.134]                                                 |               | [-0.030 - 0.032]                                             |
| Week 3                                          |     |                | 0.108***                                                   |                      | -0.025                                                           |               | -0.004                                                       |
|                                                 |     |                | [0.044 - 0.172]                                            |                      | [-0.122 - 0.072]                                                 |               | [-0.028 - 0.020]                                             |
| Week 4                                          |     |                | 0.057                                                      |                      | 0.002                                                            |               | -0.003                                                       |

|                                                 |                                                 |                                                |                                                |
|-------------------------------------------------|-------------------------------------------------|------------------------------------------------|------------------------------------------------|
| Week 5                                          | 0.121***<br>[-0.023 - 0.137]<br>[0.050 - 0.192] | -0.049<br>[-0.102 - 0.105]<br>[-0.164 - 0.066] | -0.003<br>[-0.029 - 0.023]<br>[-0.029 - 0.024] |
| Week 6                                          | 0.081***<br>[0.022 - 0.140]                     | -0.020<br>[-0.113 - 0.072]                     | -0.013<br>[-0.037 - 0.012]                     |
| Week 7                                          | 0.143***<br>[0.049 - 0.236]                     | -0.039<br>[-0.141 - 0.064]                     | -0.004<br>[-0.030 - 0.021]                     |
| Week 8                                          | -0.066<br>[-0.157 - 0.024]                      | -0.052<br>[-0.153 - 0.049]                     | -0.002<br>[-0.028 - 0.024]                     |
| Week 9                                          | 0.050<br>[-0.014 - 0.114]                       | -0.064<br>[-0.165 - 0.037]                     | -0.005<br>[-0.030 - 0.020]                     |
| Week 10                                         | 0.143***<br>[0.067 - 0.219]                     | -0.030<br>[-0.130 - 0.071]                     | -0.003<br>[-0.028 - 0.022]                     |
| Week 11                                         | 0.064**<br>[0.000 - 0.129]                      | 0.002<br>[-0.100 - 0.104]                      | 0.012<br>[-0.012 - 0.036]                      |
| Week 12                                         | 0.119***<br>[0.051 - 0.188]                     | 0.018<br>[-0.073 - 0.109]                      | -0.003<br>[-0.029 - 0.023]                     |
| Week 13                                         | 0.262***<br>[0.195 - 0.329]                     | 0.027<br>[-0.094 - 0.148]                      | 0.011<br>[-0.024 - 0.046]                      |
| Week 14                                         | 0.125**<br>[0.016 - 0.234]                      | -0.033<br>[-0.131 - 0.064]                     | -0.006<br>[-0.033 - 0.022]                     |
| Week 15                                         | 0.101**<br>[0.014 - 0.188]                      | -0.081*<br>[-0.176 - 0.014]                    | -0.007<br>[-0.032 - 0.017]                     |
| Multiple submissions<br>(ref single submission) | 0.215***<br>[0.157 - 0.273]                     | 0.194***<br>[0.134 - 0.254]                    | 0.032***<br>[0.010 - 0.055]                    |
| Observations                                    | 4,154                                           | 4,154                                          | 4,154                                          |
| R-squared                                       | 0.034                                           | 0.030                                          | 0.011                                          |

\* p<0.1, \*\* p<0.05, \*\*\* p<0.01
